# Supplementary material for: Dietary intake as a predictor for all-cause mortality in hemodialysis subjects (NUGE-HD study)
Source: PubMed Central journal article supplement (PMC6917285; doi:10.1371/journal.pone.0226568), 2019-12-17
Supplement: pone.0226568.s001.pdf [file pone.0226568.s001.pdf]

**UNIVERSIDADE FEDERAL DE VIÇOSA**  
**Núcleo de Pesquisa e Extensão em Nutrição Renal – NUPREN**  
**Nutrição e Genética nos Desfechos em Hemodiálise: NUGE – HD**

**Questionário Sociodemográfico e de Saúde**

Nº participante: \_\_\_\_\_

Data da coleta: \_\_\_\_/\_\_\_\_/\_\_\_\_ Nome: \_\_\_\_\_

Data de nascimento: \_\_\_\_/\_\_\_\_/\_\_\_\_ Idade: \_\_\_\_\_ anos Sexo: ( ) M ( ) F

Profissão: \_\_\_\_\_ Raça: ( ) Branca ( ) Negra ( ) Parda

Escolaridade: \_\_\_\_\_ Renda média: \_\_\_\_\_

Data primeira sessão de HD: \_\_\_\_/\_\_\_\_/\_\_\_\_ Tempo em tratamento de HD (meses ou anos): \_\_\_\_\_

Etiologia (causa) da doença renal: \_\_\_\_\_

Tem outro problema de saúde: \_\_\_\_\_

Apetite atual: ( ) Excelente ( ) Bom ( ) Regular ( ) Ruim

Mudanças no apetite nos últimos 6 meses: ( ) S ( ) N Causa: \_\_\_\_\_

Perda de peso nos últimos 6 meses: ( ) S ( ) N Causa: \_\_\_\_\_

Sensação de plenitude gástrica: ( ) S ( ) N Saciedade precoce: ( ) S ( ) N

Problemas de mastigação/deglutição ( ) S ( ) N Por que: \_\_\_\_\_

Adesão à dieta especial: ( ) Sim ( ) Não

Função intestinal: \_\_\_\_\_

Etilismo atual: ( ) S ( ) N Tipo bebida alcoólica/Frequência: Ex-etilista: ( ) S ( ) N

Fuma: ( ) S ( ) N Frequência: \_\_\_\_\_ Ex-tabagista: ( ) S ( ) N

Faz exercícios regularmente: ( ) S ( ) N Qual (is)/Frequência: \_\_\_\_\_

Medicamentos em uso: \_\_\_\_\_

Função renal residual: ( ) S ( ) N Volume urinário (L ou mL): \_\_\_\_\_

Ingestão hídrica diária (mL ou L): \_\_\_\_\_

Ganho de peso interdialítico (Média mensal): \_\_\_\_\_ Peso atual: \_\_\_\_\_ Kg

Estatura: \_\_\_\_\_ IMC: \_\_\_\_\_ Classificação: \_\_\_\_\_

**UNIVERSIDADE FEDERAL DE VIÇOSA**  
**Research and Extension Centre in Renal Nutrition**  
**Nutrition and Genetic on Hemodialysis outcomes: NUGE – HD**

**Sociodemographic and Health Questionnaire**

Study ID number: \_\_\_\_\_

Collection date: \_\_\_\_/\_\_\_\_/\_\_\_\_ Name: \_\_\_\_\_

Date of birth: \_\_\_\_/\_\_\_\_/\_\_\_\_ Age: \_\_\_\_\_ years Sex: ( ) M ( ) F

Occupation: \_\_\_\_\_ Skin color: ( ) White ( ) Black ( ) Brown

Escolaridade: \_\_\_\_\_ Average income: \_\_\_\_\_

Date of first HD session: \_\_\_\_/\_\_\_\_/\_\_\_\_ Time on HD treatment (months or years): \_\_\_\_\_

Etiology (cause) of kidney disease: \_\_\_\_\_

There is another health problem: \_\_\_\_\_

Current Appetite: ( ) Excelent ( ) Good ( ) Regular ( ) Bad

Appetite changes in the last 6 months: ( ) Y ( ) N Cause: \_\_\_\_\_

Weight loss in the last 6 months: ( ) Y ( ) N Cause: \_\_\_\_\_

Gastric fullness sensation: ( ) Y ( ) N Early Satiety: ( ) Y ( ) N

Chewing/Swallowing Problems: ( ) Y ( ) N Why: \_\_\_\_\_

Adherence to special diet: ( ) Yes ( ) No

Intestinal Function: \_\_\_\_\_

Current Ethylism: ( ) Y ( ) N Alcohol Type/Frequency: \_\_\_\_\_ Former alcoholic: ( ) Y ( ) N

Smoke: ( ) Y ( ) N Frequency: \_\_\_\_\_ Former smoker ( ) Y ( ) N

Do exercises regularly: ( ) Y ( ) N What/Frequency: \_\_\_\_\_

Medicines in use: \_\_\_\_\_

Residual renal function: ( ) Y ( ) N Urinary Volume (L or mL): \_\_\_\_\_

Daily water intake (mL or L): \_\_\_\_\_

Interdialytic Weight Gain (Monthly Average): \_\_\_\_\_ Current Weight: \_\_\_\_\_ Kg

Height: \_\_\_\_\_ BMI: \_\_\_\_\_ Classificação: \_\_\_\_\_
